# Supplementary material for: Modified Co4N by B-doping for high-performance hybrid supercapacitors
Source: Royal Society of Chemistry journal article supplement (doi:10.1039/d0nr04043f), 2020-01-01
Supplement: d0nr04043f1.pdf [file d0nr04043f1.pdf]

**Modified Co<sub>4</sub>N by B-doping for high performances hybrid  
supercapacitors**

Zonghua Wang<sup>1</sup>, Guangmeng Qu<sup>1</sup>, Chenggang Wang, Xixi Zhang, Guotao Xiang,  
Peiyu Hou, Xijin Xu\*

School of Physics and Technology, University of Jinan, Shandong 250022, P.R.  
China

Corresponding authors: (Xijin Xu) [sps\\_xuxj@ujn.edu.cn](mailto:sps_xuxj@ujn.edu.cn)

<sup>1</sup>The authors contribute equally to the manuscript.

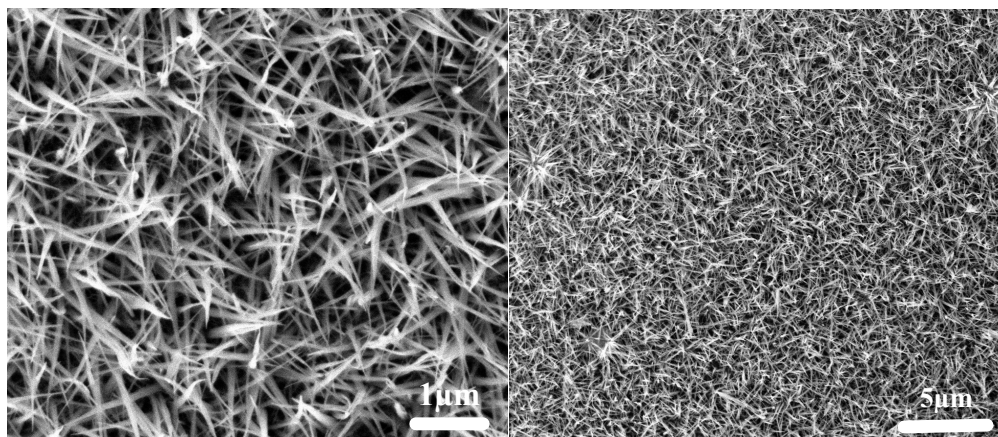

Fig. S1 SEM image of  $\text{Co(OH)}_2$ .

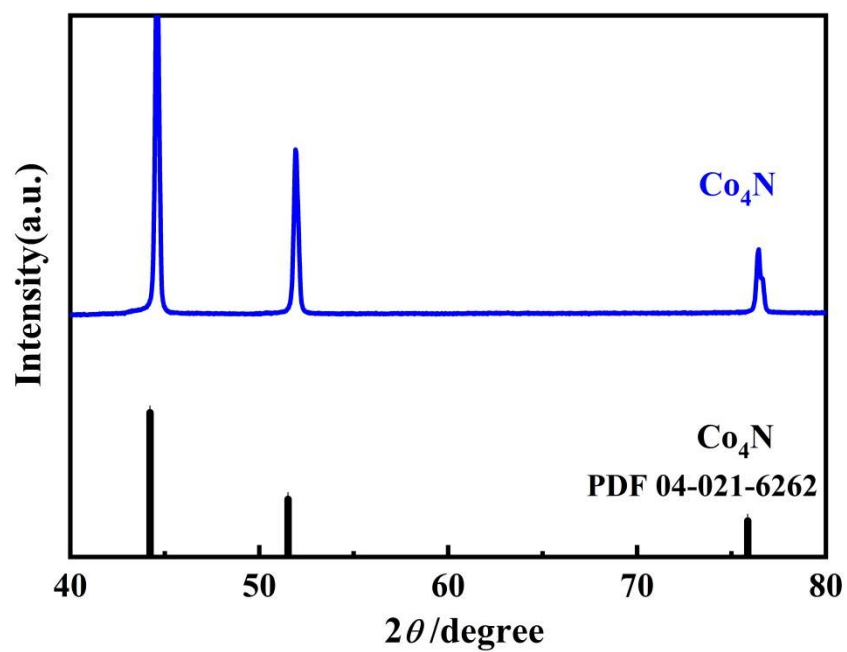

Fig. S2 XRD spectrum image of  $\text{Co}_4\text{N}$ .

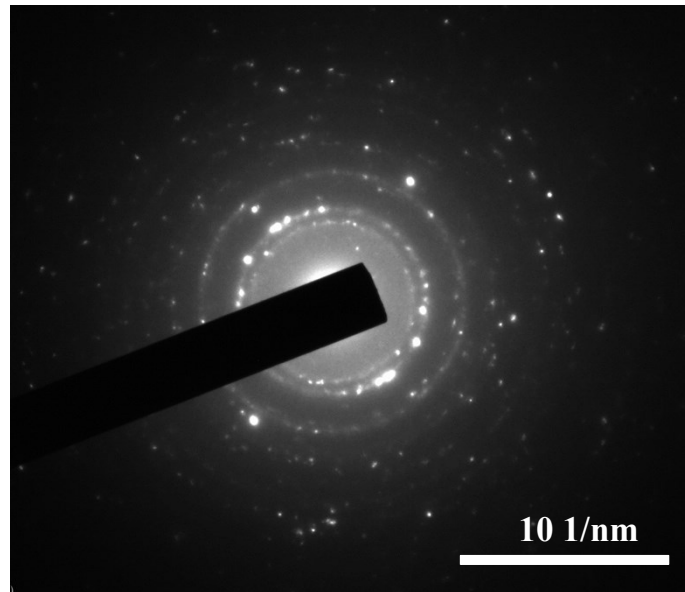

Fig. S3 SAED pattern of B-Co<sub>4</sub>N-20.

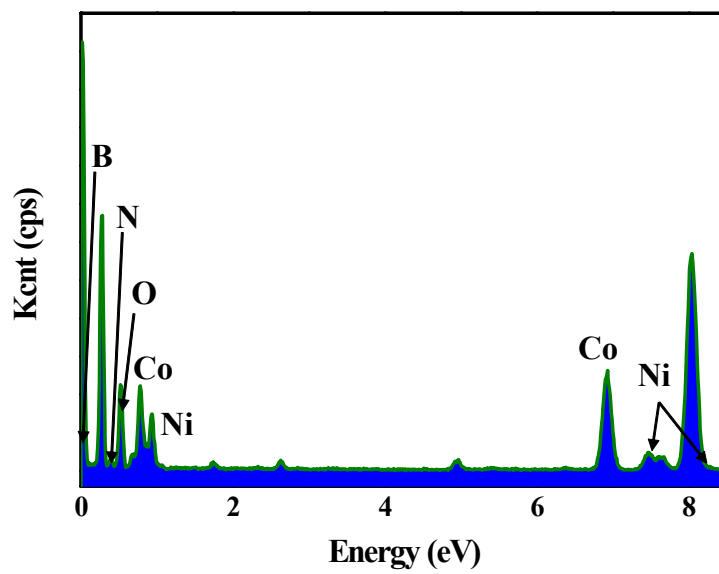

Fig. S4 EDS spectrum of B-Co<sub>4</sub>N-20.

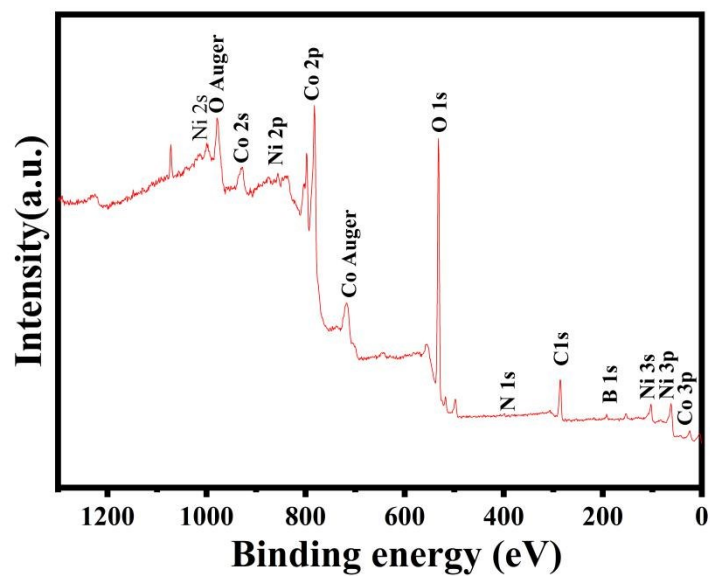

Fig. S5 XPS survey of B-Co<sub>4</sub>N-20.

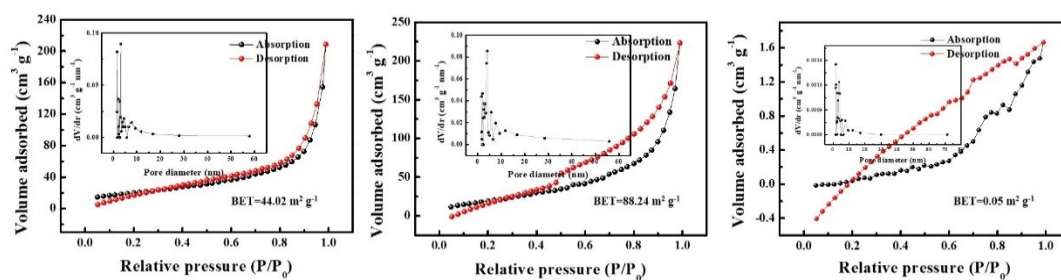

Fig. S6 Plots of N<sub>2</sub> adsorption-desorption isotherm and pore size distribution of (a) Co<sub>4</sub>N/NF (b) B-Co<sub>4</sub>N-20/NF (c) pure Ni foam

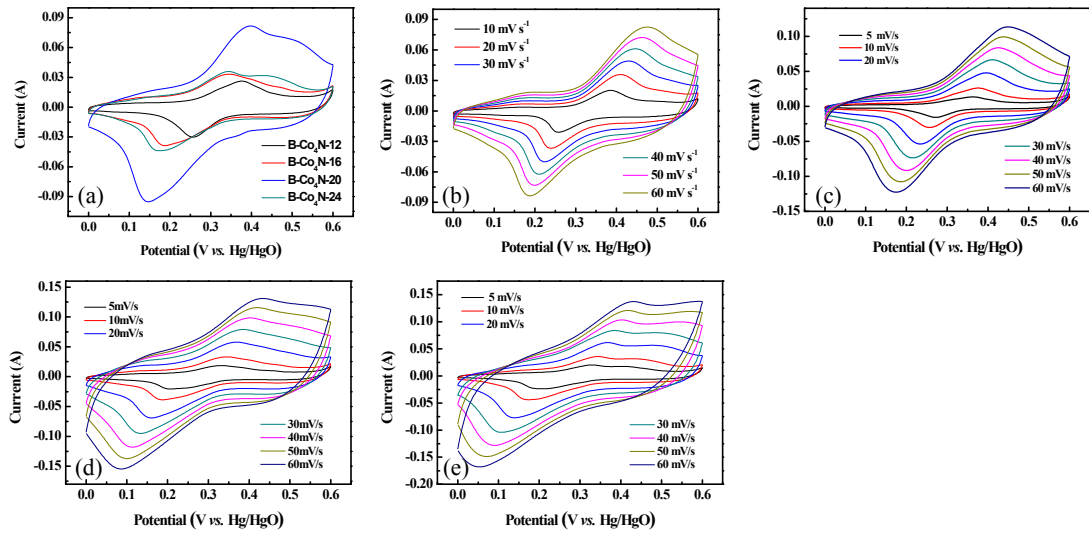

**Fig. S7** CV curves of (a) B-Co<sub>4</sub>N at 10 mV/s (b) Co<sub>4</sub>N (c) B-Co<sub>4</sub>N-12 (d) B-Co<sub>4</sub>N-16 (e) B-Co<sub>4</sub>N-24.

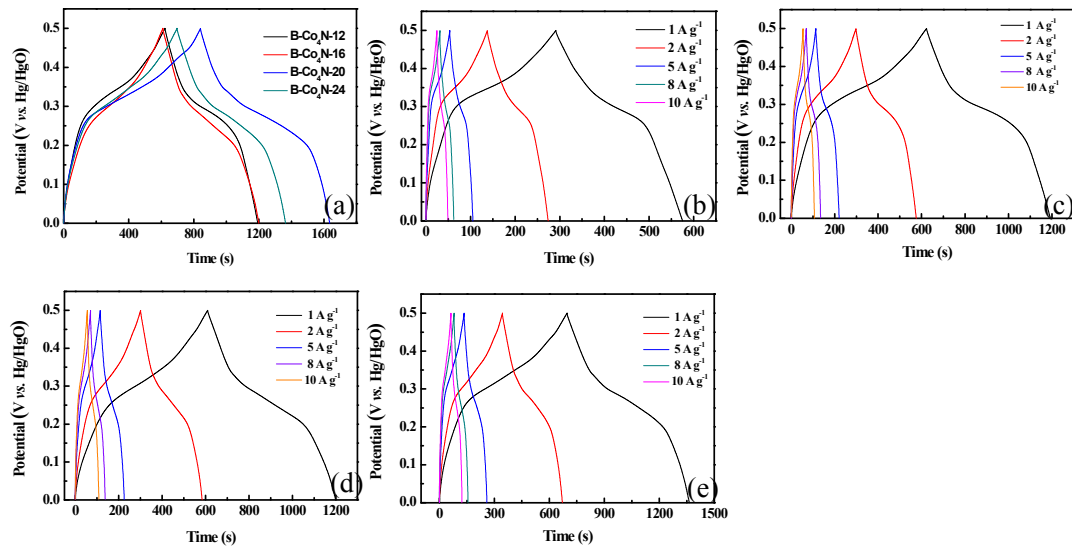

**Fig. S8** GCD curves of a) B-Co<sub>4</sub>N at 1 A g<sup>-1</sup> (b) Co<sub>4</sub>N (c) B-Co<sub>4</sub>N-12 (d) B-Co<sub>4</sub>N-16 (e) B-Co<sub>4</sub>N-24.

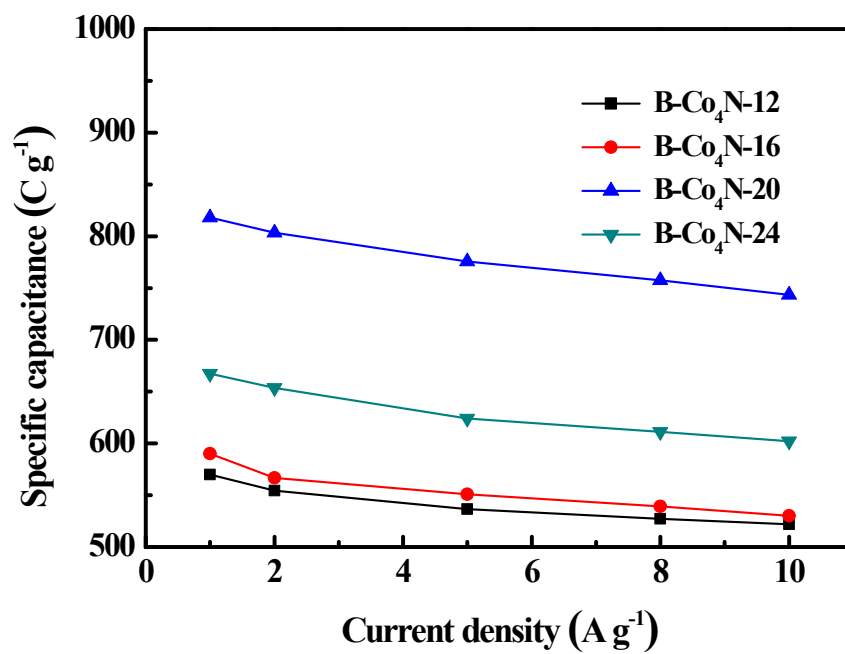

Fig. S9 Ratio image of B-Co<sub>4</sub>N.

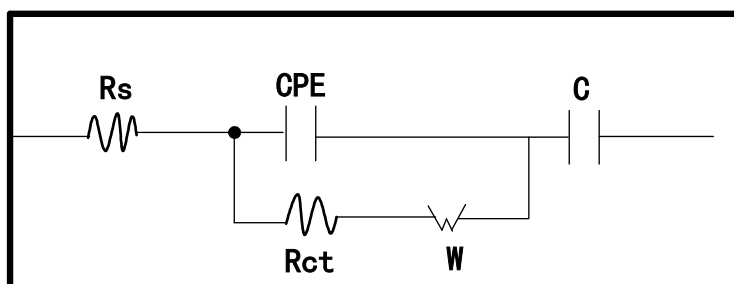

Fig. S10 Equivalent circuit image of EIS fitting.

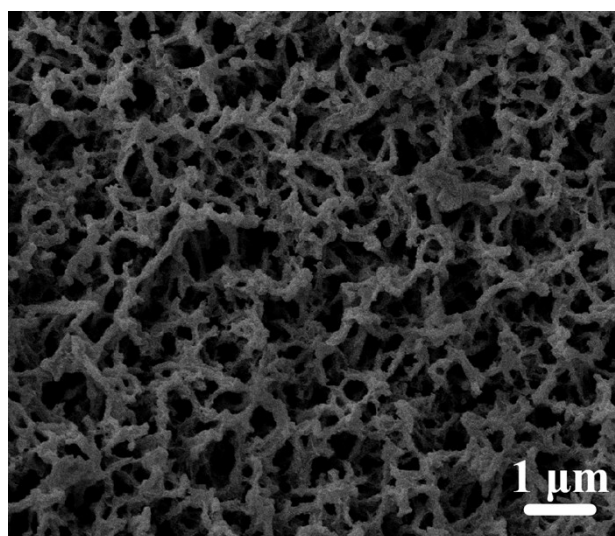

**Fig. S11** SEM images of B-Co<sub>4</sub>N-20/NF after 5000 cycles.

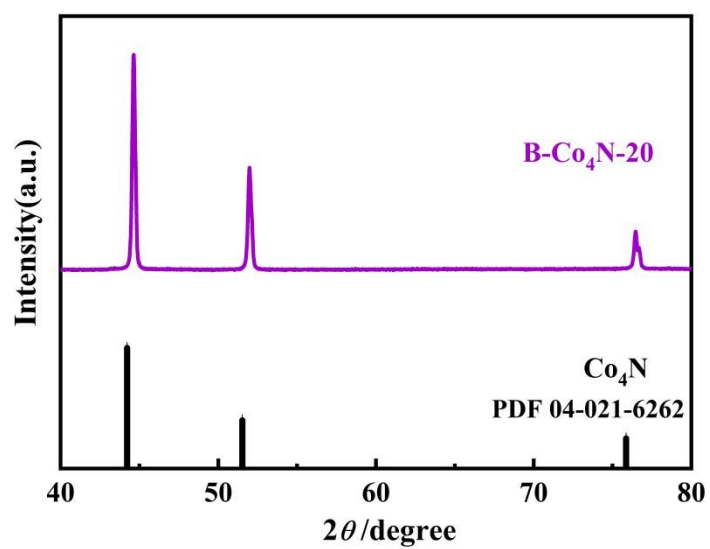

**Fig. S12** XRD spectrum of B-Co<sub>4</sub>N-20/NF after 5000 cycles.

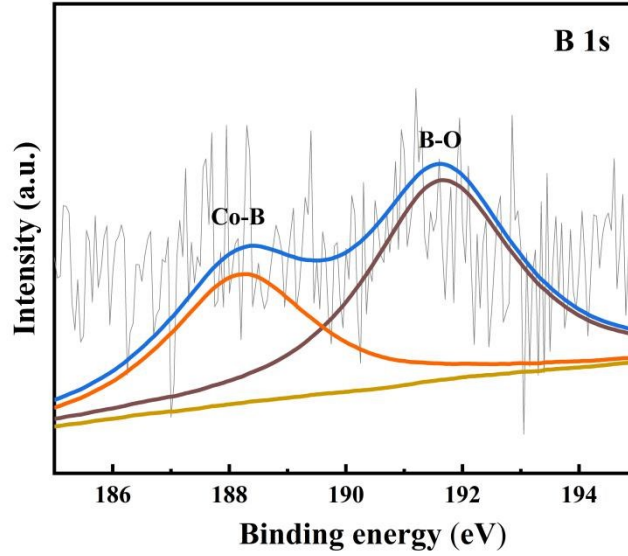

Fig. S13 XPS B1s spectrum of B-Co<sub>4</sub>N-20/NF after 5000 cycles.

Table S1. The summary of some recent similar works.

| Materials                                           | Morphology           | Electrolyte                         | Capacitance                                                                                            | Cycle retention                                   | Ref.             |
|-----------------------------------------------------|----------------------|-------------------------------------|--------------------------------------------------------------------------------------------------------|---------------------------------------------------|------------------|
| CoS/N-doped C dots                                  | Flower-like          | 3.0M KOH                            | 697 F g <sup>-1</sup> (1A g <sup>-1</sup> )                                                            | 80.3% (10000 th)                                  | 1                |
| CoS                                                 | Flower-like          | 6.0M KOH                            | 348 F g <sup>-1</sup> (1A g <sup>-1</sup> )                                                            | 97.2% (1000 th)                                   | 2                |
| Co <sub>9</sub> S <sub>8</sub>                      | Nanosheets           | 1.0M KOH                            | 954.5 F g <sup>-1</sup> (1A g <sup>-1</sup> )                                                          | 87.4% (1000th)                                    | 3                |
| Co <sub>3</sub> O <sub>4</sub>                      | Nanocrystals         | 0.5M H <sub>3</sub> PO <sub>4</sub> | 1049 F g <sup>-1</sup> (1mV s <sup>-1</sup> )                                                          | 100%(20000th)*                                    | 4                |
| CoP                                                 | Hollow microspheres  | 6.0M KOH                            | 449.4 F g <sup>-1</sup> (1A g <sup>-1</sup> )                                                          | 80.9%(3000th)                                     | 5                |
| CoP                                                 | Microcubes           | 6.0M KOH                            | 560 F g <sup>-1</sup> (1A g <sup>-1</sup> )                                                            | 91.2%(10000th)                                    | 6                |
| CoSe                                                | Nanosheets           | 2.0M KOH                            | 70.6 (1A g <sup>-1</sup> )                                                                             | 95.4%(20000th)                                    | 7                |
| CoSe <sub>2</sub>                                   | Nanoparticles        | 6.0M KOH                            | 120.2 mAh g <sup>-1</sup> (1A g <sup>-1</sup> )                                                        | 92 % (10000th)                                    | 8                |
| Co <sub>0.85</sub> Se                               | Hollow spheres       | 2.0M KOH                            | 1220 F g <sup>-1</sup> (1A g <sup>-1</sup> )                                                           | 88.8 % (10000th)*                                 | 9                |
| CoS <sub>2</sub>                                    | Hollow dodecahedrons | 2.0M KOH                            | 375.2 C g <sup>-1</sup> (1A g <sup>-1</sup> )                                                          | 92.1 % (5000th)*                                  | 10               |
| CoNi-MOF                                            | Nanosheets           | 1.0M KOH                            | 1044 F g <sup>-1</sup> (1A g <sup>-1</sup> )                                                           | 94 % (5000th)                                     | 11               |
| Co <sub>5</sub> O <sub>4</sub> /Co(OH) <sub>2</sub> | Nanopolyhedron       | 1.0M KOH                            | 184.9 mAh g <sup>-1</sup> (1A g <sup>-1</sup> )                                                        | 91 % (5000th)                                     | 12               |
| VN                                                  | Nano-tree-like       | 0.5M K <sub>2</sub> SO <sub>4</sub> | 37.5 mF cm <sup>-2</sup>                                                                               | 85 % (20000th)                                    | 13               |
| TiN/MoN <sub>x</sub>                                | Moss-like nanosheet  | 1.0M KOH                            | 174.83 F g <sup>-1</sup> (1.5A g <sup>-1</sup> )                                                       | 93.8 % (1000th)                                   | 14               |
| C/Mo <sub>x</sub> N                                 | Nanofibers           | 1.0M H <sub>2</sub> SO <sub>4</sub> | 251 F g <sup>-1</sup> (1A g <sup>-1</sup> )                                                            | 78.6 % (15000th)*                                 | 15               |
| W <sub>2</sub> N                                    | Film                 | 1.0M H <sub>2</sub> SO <sub>4</sub> | 163 F g <sup>-1</sup> (0.5 mA cm <sup>-2</sup> )                                                       | 94 % (10000th)                                    | 16               |
| CrN                                                 | Nanoparticles        | 1.0M LiPF <sub>6</sub>              | 75 F g <sup>-1</sup> (30 mA g <sup>-1</sup> )                                                          | 100 % (120th)                                     | 17               |
| TiN                                                 | Nano-pyramid         | 1.0M KOH                            | 385 F g <sup>-1</sup> (1A g <sup>-1</sup> )                                                            | 92.6 % (30000th)*                                 | 18               |
| Ni <sub>3</sub> N                                   | Nanosheets           | 1.0M KOH                            | 845 F g <sup>-1</sup> (10 mV s <sup>-1</sup> )                                                         | 50 % (2000th)                                     | 19               |
| <i>h</i> -BN/C                                      | Nanosheets           | 2.0M KOH                            | 250 F g <sup>-1</sup> (0.5A g <sup>-1</sup> )                                                          | 86 % (1000th)                                     | 20               |
| TiN                                                 | Nanoparticles        | 1.0M H <sub>2</sub> SO <sub>4</sub> | 120 F cm <sup>-3</sup> (0.83mA cm <sup>-3</sup> )                                                      | 99 % (3000th)                                     | 21               |
| <b>B-Co<sub>4</sub>N-20/NF</b>                      | <b>Nanoneedles</b>   | <b>3.0M KOH</b>                     | <b>817.9 C g<sup>-1</sup> (1A g<sup>-1</sup>)</b><br><b>743.5 C g<sup>-1</sup> (1A g<sup>-1</sup>)</b> | <b>93.06% (5000th)</b><br><b>98.59% (5000th)*</b> | <b>This work</b> |

\*corresponding two-electrode device



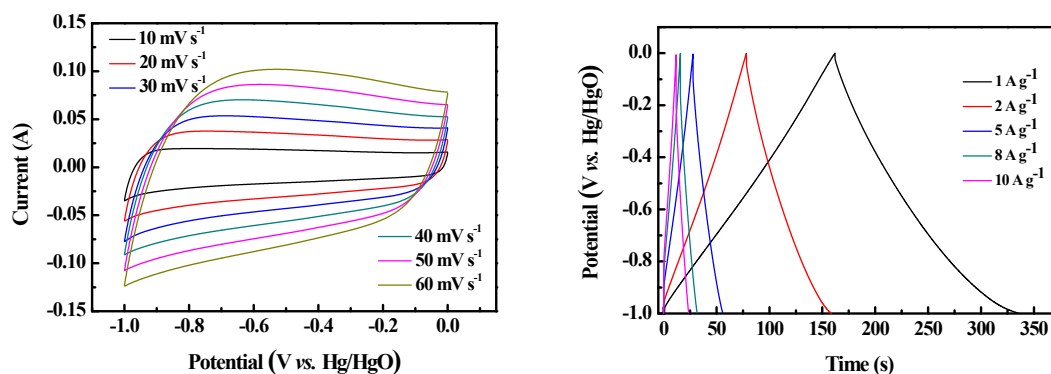

**Fig. S14** CV curves and GCD curves of AC/CF.

## References

- Z. Ji, N. Li, M. Xie, X. Shen, W. Dai, K. Liu, K. Xu and G. Zhu, *Electrochimica Acta*, 2020, **334**, 135632.
- K. Ashok Kumar, A. Pandurangan, S. Arumugam and M. Sathiskumar, *Scientific Reports*, 2019, **9**, 1228.
- X. Han, K. Tao, D. Wang and L. Han, *Nanoscale*, 2018, **10**, 2735-2741.
- X. Y. Liu, Y. Q. Gao and G. W. Yang, *Nanoscale*, 2016, **8**, 4227-4235.
- L. Ding, K. Zhang, L. Chen, Z. Yu, Y. Zhao, G. Zhu, G. Chen, D. Yan, H. Xu and A. Yu, *Electrochimica Acta*, 2019, **299**, 62-71.
- W. Wang, L. Zhang, G. Xu, H. Song, L. Yang, C. Zhang, J. Xu and D. Jia, *Inorganic Chemistry*, 2018, **57**, 10287-10294.
- Y. Zhu, Z. Huang, Z. Hu, L. Xi, X. Ji and Y. Liu, *Electrochimica Acta*, 2018, **269**, 30-37.
- C. Miao, X. Xiao, Y. Gong, K. Zhu, K. Cheng, K. Ye, J. Yan, D. Cao, G. Wang and P. Xu, *ACS Applied Materials & Interfaces*, 2020, **12**, 9365-9375.
- N. Hussain, F. Wu, L. Xu and Y. Qian, *Nano Research*, 2019, **12**, 2941-2946.
- H. Jia, Z. Wang, X. Zheng, Y. Cai, J. Lin, H. Liang, J. Qi, J. Cao, J. Feng and W. Fei, *Electrochimica Acta*, 2019, **312**, 54-61.
- T. Deng, Y. Lu, W. Zhang, M. Sui, X. Shi, D. Wang and W. Zheng, *Advanced Energy Materials*, 2018, **8**, 1702294.
- G. Lee and J. Jang, *Journal of Power Sources*, 2019, **423**, 115-124.
- N. Ouldhamadouche, A. Achour, R. Lucio-Porto, M. Islam, S. Solaymani, A. Arman, A. Ahmadpourian, H. Achour, L. Le Brizoual, M. A. Djouadi and T. Brousse, *Journal of Materials Science & Technology*, 2018, **34**, 976-982.
- Y. Xie and F. Tian, *Materials Science and Engineering: B*, 2017, **215**, 64-70.
- Y. Tan, L. Meng, Y. Wang, W. Dong, L. Kong, L. Kang and F. Ran, *Electrochimica Acta*, 2018, **277**, 41-49.
- R. Prakash, A. Kumar, A. Pandey and D. Kaur, *International Journal of Hydrogen Energy*, 2019, **44**, 10823-10832.

17. B. Das, M. Behm, G. Lindbergh, M. V. Reddy and B. V. R. Chowdari, *Advanced Powder Technology*, 2015, **26**, 783-788.
18. M. Arif, A. Sanger and A. Singh, *Materials Letters*, 2019, **245**, 142-146.
19. M.-S. Balogun, Y. Zeng, W. Qiu, Y. Luo, A. Onasanya, T. K. Olaniyi and Y. Tong, *Journal of Materials Chemistry A*, 2016, **4**, 9844-9849.
20. T. Li, X. Jiao, T. You, F. Dai, P. Zhang, F. Yu, L. Hu, L. Ding, L. Zhang, Z. Wen and Y. Wu, *Ceramics International*, 2019, **45**, 4283-4289.
21. P. Qin, X. Li, B. Gao, J. Fu, L. Xia, X. Zhang, K. Huo, W. Shen and P. K. Chu, *Nanoscale*, 2018, **10**, 8728-8734.
